1 Title: Estimation of the asymptomatic ratio of novel coronavirus (2019-nCoV)  
2 infections among passengers on evacuation flights

3

4 Authors:

5 Hiroshi Nishiura, M.D., Ph.D.<sup>1</sup>

6 Tetsuro Kobayashi, M.D., M.P.H.<sup>1</sup>

7 Takeshi Miyama, D.V.M.<sup>2</sup>

8 Ayako Suzuki, M.D., M.P.H.<sup>1</sup>

9 Sung-mok Jung, M.P.H.<sup>1</sup>

10 Katsuma Hayashi, M.D.<sup>1</sup>

11 Ryo Kinoshita, M.H.Sc.<sup>1</sup>

12 Yichi Yang, B.Sc.<sup>1</sup>

13 Baoyin Yuan, M.Sc.<sup>1</sup>

14 Andrei R. Akhmetzhanov, Ph.D.<sup>1</sup>

15 Natalie M. Linton, M.P.H.<sup>1</sup>

16 1. Graduate School of Medicine, Hokkaido University, Sapporo, 060-8638, Japan

17 2. Osaka Institute of Public Health, Osaka, 537-0025, Japan

18 (Correspondence to Hiroshi Nishiura at: Address: Kita 15 Jo Nishi 7 Chome, Kita-ku,

19 Sapporo-shi, Hokkaido 060-8638, Japan, Tel: +81-11-706-5066; Fax: +81-11-706-7819;

20 Email: nishiurah@med.hokudai.ac.jp)

21

22 The number of novel coronavirus (2019-nCoV) cases worldwide continues to grow, and

23 the gap between reports from China and statistical estimates of incidence based on cases

24 diagnosed outside China indicates that a substantial number of cases are

25 underdiagnosed.<sup>1</sup> Estimation of the asymptomatic ratio—the percentage of carriers with  
26 no symptoms—will improve understanding of 2019-nCoV transmission and the spectrum  
27 of disease it causes, providing insight into epidemic spread. Although the asymptomatic  
28 ratio is conventionally estimated using seroepidemiological data,<sup>2,3</sup> collection of these  
29 data requires significant logistical effort, time, and cost. Instead, we propose to estimate  
30 the asymptomatic ratio by using information on Japanese nationals that evacuated from  
31 Wuhan, China on chartered flights.

32 Figure 1 illustrates the flow of the evacuation process. As of 1 February 2020 a  
33 total of  $N=565$  citizens were evacuated. Among them,  $pN=63$  (11.2%) were considered  
34 symptomatic upon arrival based on (1) temperature screening before disembarkation,  
35 and (2) face-to-face interviews eliciting information on symptoms including fever,  
36 cough, and other non-specific symptoms consistent with 2019-nCoV infection. All  
37 passengers additionally undertook reverse transcription polymerase chain reaction  
38 (RT-PCR) testing, and  $m=4$  asymptomatic and  $n=4$  symptomatic passengers tested  
39 positive for 2019-nCoV.

40 Employing a Bayes theorem, the asymptomatic ratio is defined as

$$\Pr(\text{asymptomatic} \mid \text{infection}) = \frac{\Pr(\text{infection} \mid \text{asymptomatic}) \Pr(\text{asymptomatic})}{\Pr(\text{infection})},$$

41 which can be calculated as  $m/(n+m)$ , as seen in Figure 1. The asymptomatic ratio is thus  
42 estimated at 50.0% (95% confidence interval (CI): 12.5%, 87.5%) among evacuees. As  
43 only seven days have elapsed since their departure from Wuhan—slightly longer than  
44 the median estimate of the 2019-nCoV incubation period<sup>4,5</sup>—there is a 20 to 30%  
45 probability that the four virus-positive asymptomatic individuals will develop symptoms.

46 Should one of the four becomes symptomatic in the future, the overall asymptomatic  
47 ratio would decrease to 37.5% (95% CI: 12.5%, 75.0%).

48 In general, asymptomatic infections cannot be recognized if they are not  
49 confirmed by RT-PCR or other laboratory testing, and symptomatic cases may not be  
50 detected if they do not seek medical attention. Estimates such as this therefore provide  
51 important insight by using a targeted population to assess prevalence of asymptomatic  
52 viral shedding. Despite a small sample size, our estimation indicates that perhaps more  
53 than a half of 2019-nCoV-infected individuals are asymptomatic. This ratio is  
54 comparable to that of influenza, which was estimated at 56–80%<sup>3</sup> using similar  
55 definitions for symptomatic individuals. There is great need for further studies on the  
56 prevalence of asymptomatic 2019-nCoV infections to guide epidemic control efforts.

57

58 **Conflict of interest:**

59 We declare that we have no conflict of interest.

60 **References:**

- 61 1. Nishiura H, Jung SM, Linton NM, Kinoshita R, Yang Y, Hayashi K, Kobayashi T,  
62 Yuan B, Akhmetzhanov AR. The Extent of Transmission of Novel Coronavirus in  
63 Wuhan, China, 2020. *J Clin Med.* 2020;9(2). pii: E330. doi: 10.3390/jcm9020330.
- 64 2. Carrat F, Vergu E, Ferguson NM, Lemaître M, Cauchemez S, Leach S, Valleron AJ:  
65 Time lines of infection and disease in human influenza: a review of volunteer challenge  
66 studies. *Am J Epidemiol.* 2008, 167 (7): 775-785. doi: 10.1093/aje/kwm375.
- 67 3. Hsieh Y, Tsai C, Lin C, et al. Asymptomatic ratio for seasonal H1N1 influenza  
68 infection among schoolchildren in Taiwan. *BMC Infect Dis* 2014;14: 80. doi:  
69 10.1186/1471-2334-14-80.

70 4. Li Q, Guan X, Wu P, Wang X, Zhou L, Tong Y, Ren R, Leung KSM, Lau EHY, Wong  
71 JY, Xing X, Xiang N, Wu Y, Li C, Chen Q, Li D, Liu T, Zhao J, Li M, Tu W, Chen C,  
72 Jin L, Yang R, Wang Q, Zhou S, Wang R, Liu H, Luo Y, Liu Y, Shao G, Li H, Tao Z,  
73 Yang Y, Deng Z, Liu B, Ma Z, Zhang Y, Shi G, Lam TTY, Wu JTK, Gao GF, Cowling  
74 BJ, Yang B, Leung GM, Feng Z. Early Transmission Dynamics in Wuhan, China, of  
75 Novel Coronavirus-Infected Pneumonia. *N Engl J Med.* 2020; in press. doi:  
76 10.1056/NEJMoa2001316

77 5. Linton NM, Kobayashi T, Yang Y, Hayashi K, Andrei, AR, Jung S-M, Yuan B,  
78 Kinoshita R, Nishiura H. (2020). Epidemiological characteristics of novel coronavirus  
79 infection: A statistical analysis of publicly available case data. medRxiv. doi:  
80 10.1101/2020.01.26.20018754.

81

## 82 Figure legend

83 Figure 1. Flow of symptom screening and viral testing for passengers on chartered

84 evacuation flights from Wuhan, China to Japan

85 The flow of Japanese residents evacuating from Wuhan and screened in Japan. A total of

86  $N$  passengers were evaluated of which a fraction  $p$  were symptomatic upon arrival.

87 Among symptomatic and asymptomatic individuals,  $n$  and  $m$  persons tested positive for

88 the virus via reverse transcription polymerase chain reaction (RT-PCR).

Entry screening

RT-PCR

Charter flights

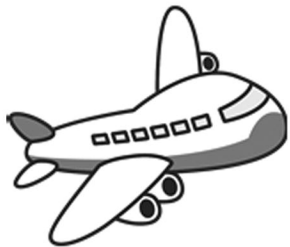

$N$  passengers

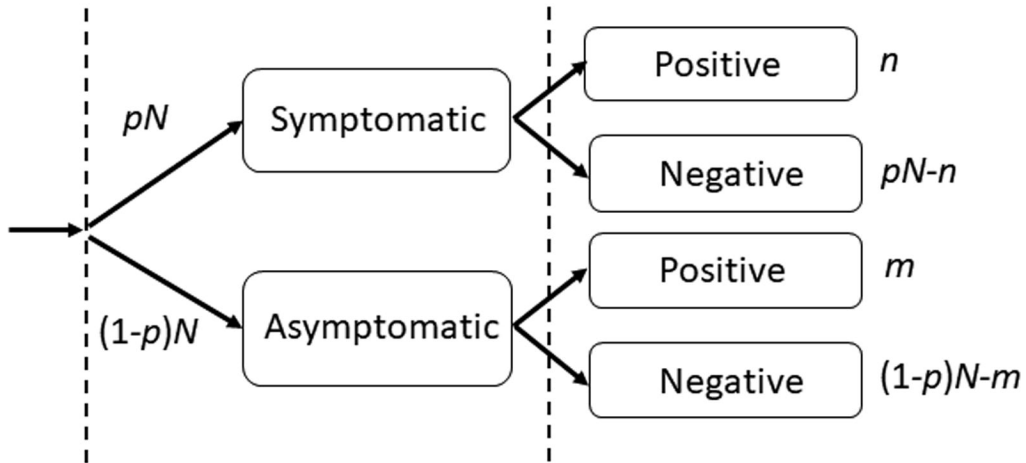

Source: https://www.medrxiv.org/content/early/2020/02/11/2020.02.03.20020248.full.pdf
